# Supplementary material
Source: Springer Nature journal article supplement (https://www.springermedizin.de/resource/supplementary/12939_2013_374_MOESM4_ESM.pdf/9551012)
Supplement: MOESM4 [file 9551012]

**Box 1: Theoretical sampling: examples of questions asked during the theoretical sampling**

**Category 1: Possessing a wider vision of public health**

In your earlier interview you mentioned that that your perception of public health is influenced by your personal life. Could you elaborate on how your personal life including family, community, social life, schooling and work experiences influence your understanding and interpretation of public health?

Could you talk about incidents in your professional life that explain your perception of public's health?

**Category 2: Engaging in appropriate pedagogical practices**

How are your experiences, values and perceptions of public health reflected in your teaching?

How much of what you teach is informed by your personal experience, and how much by formal public health learning?

How much of your teaching style is influenced by your understanding of public health content?

How much of your teaching style is influenced by the way you learned public health?
